# Supplementary material for: Metals likely promoted protometabolism in early ocean alkaline hydrothermal systems
Source: PubMed Central journal article supplement — Sci Adv. 2019 Jun 19;5(6):eaav7848. doi: 10.1126/sciadv.aav7848 (PMC6584212; doi:10.1126/sciadv.aav7848), 2019-06-19
Supplement: aav7848_SM.pdf [file aav7848_SM.pdf]

## Supplementary Materials for

### Metals likely promoted protometabolism in early ocean alkaline hydrothermal systems

Norio Kitadai\*, Ryuhei Nakamura, Masahiro Yamamoto, Ken Takai, Naohiro Yoshida, Yoshi Oono

\*Corresponding author. Email: nkitadai@elsi.jp

Published 19 June 2019, *Sci. Adv.* **5**, eaav7848 (2019)

DOI: 10.1126/sciadv.aav7848

#### This PDF file includes:

- Fig. S1. A schematic of the electrochemical cell.
- Fig. S2. XRD patterns of FeS electrolyzed at  $-1.0$  V versus SHE for different durations.
- Fig. S3. XRD patterns of metal sulfides before and after the 7-day electrolysis.
- Fig. S4. Total charges build up during the electrolysis.
- Fig. S5. Calibration curves for organic acids by the LC-electric conductivity detector system.
- Fig. S6. Calibration curves for  $\text{NO}_3^-$  and  $\text{NO}_2^-$  by the LC-electric conductivity detector system.
- Fig. S7. Calibration curves for amino acids and ammonia by the LC-fluorescence detector system.
- Fig. S8. Calibration curves for  $\text{H}_2$ ,  $\text{CO}$ ,  $\text{CH}_4$ , and  $\text{C}_2\text{H}_6$  by the GC-BID detector system.
- Fig. S9. Nonenzymatic reactions in the presence of pure  $\text{H}_2$  gas,  $\text{FeCl}_2$ , FeS, FeS\_PERM, and  $\text{Fe}^0$  and those examined in the absence of reductant.
- Fig. S10. Analytical results of fumarate (5 mM, 1.5 ml) incubated with the FeS\_PERM (100 mg) at  $80^\circ\text{C}$  for 2 days.
- Fig. S11. Reductive amination of four keto acids promoted by the FeS\_PERM in one serum bottle.
- Fig. S12. XRD patterns of CuS electrolyzed at  $-0.8$  and  $-1.0$  V (versus SHE) for short durations.
- Fig. S13. XRD patterns of pure  $\text{Fe}^0$  used in the present study.
- Fig. S14. GC chromatograms of the gas headspaces of serum bottles measured after the reduction experiments of organic/inorganic compounds.
- Table S1. Summary of the reduction experiments of organic/inorganic compounds.
- Table S2. Amounts of  $\text{H}_2$ ,  $\text{CO}$ ,  $\text{CH}_4$ , and  $\text{C}_2\text{H}_6$  in the serum bottles (30 ml) after the reduction experiments of organic/inorganic compounds.
- Table S3. Thermodynamic data for sulfide minerals.

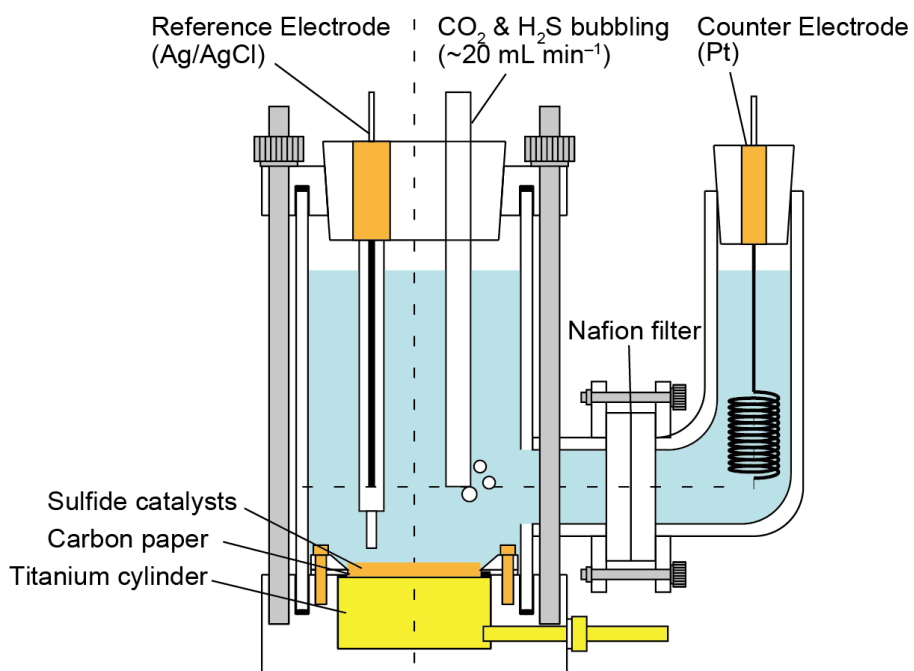

**Fig. S1. A schematic of the electrochemical cell.** The cell is made of a Pyrex glass tube sandwiched between a polyoxymethylene (POM) cap and basement that were tightened together with stainless screws and knurled nuts. The cell has two compartments: a large working electrode side (~100 mL) and a small counter electrode side (~15 mL) that are separated by a proton exchange membrane (Nafion 117; DuPont). On the working electrode side, a titanium cylinder (purity; 99.5%) is placed at the center of the POM basement, and is coated with carbon paper (5.7 cm<sup>2</sup>) with a silicon and POM packings. An Ag/AgCl electrode (in saturated KCl) is used as the reference, and is fixed at a distance of less than 0.5 cm from the working electrode to reduce solution resistance. On the counter side, a platinum coil is inserted into the glass tube, and is used as the counter electrode.

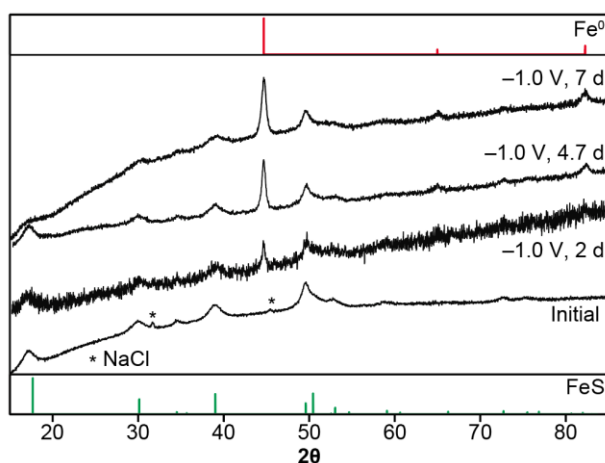

**Fig. S2. XRD patterns of FeS electrolyzed at -1.0 V versus SHE for different durations.**

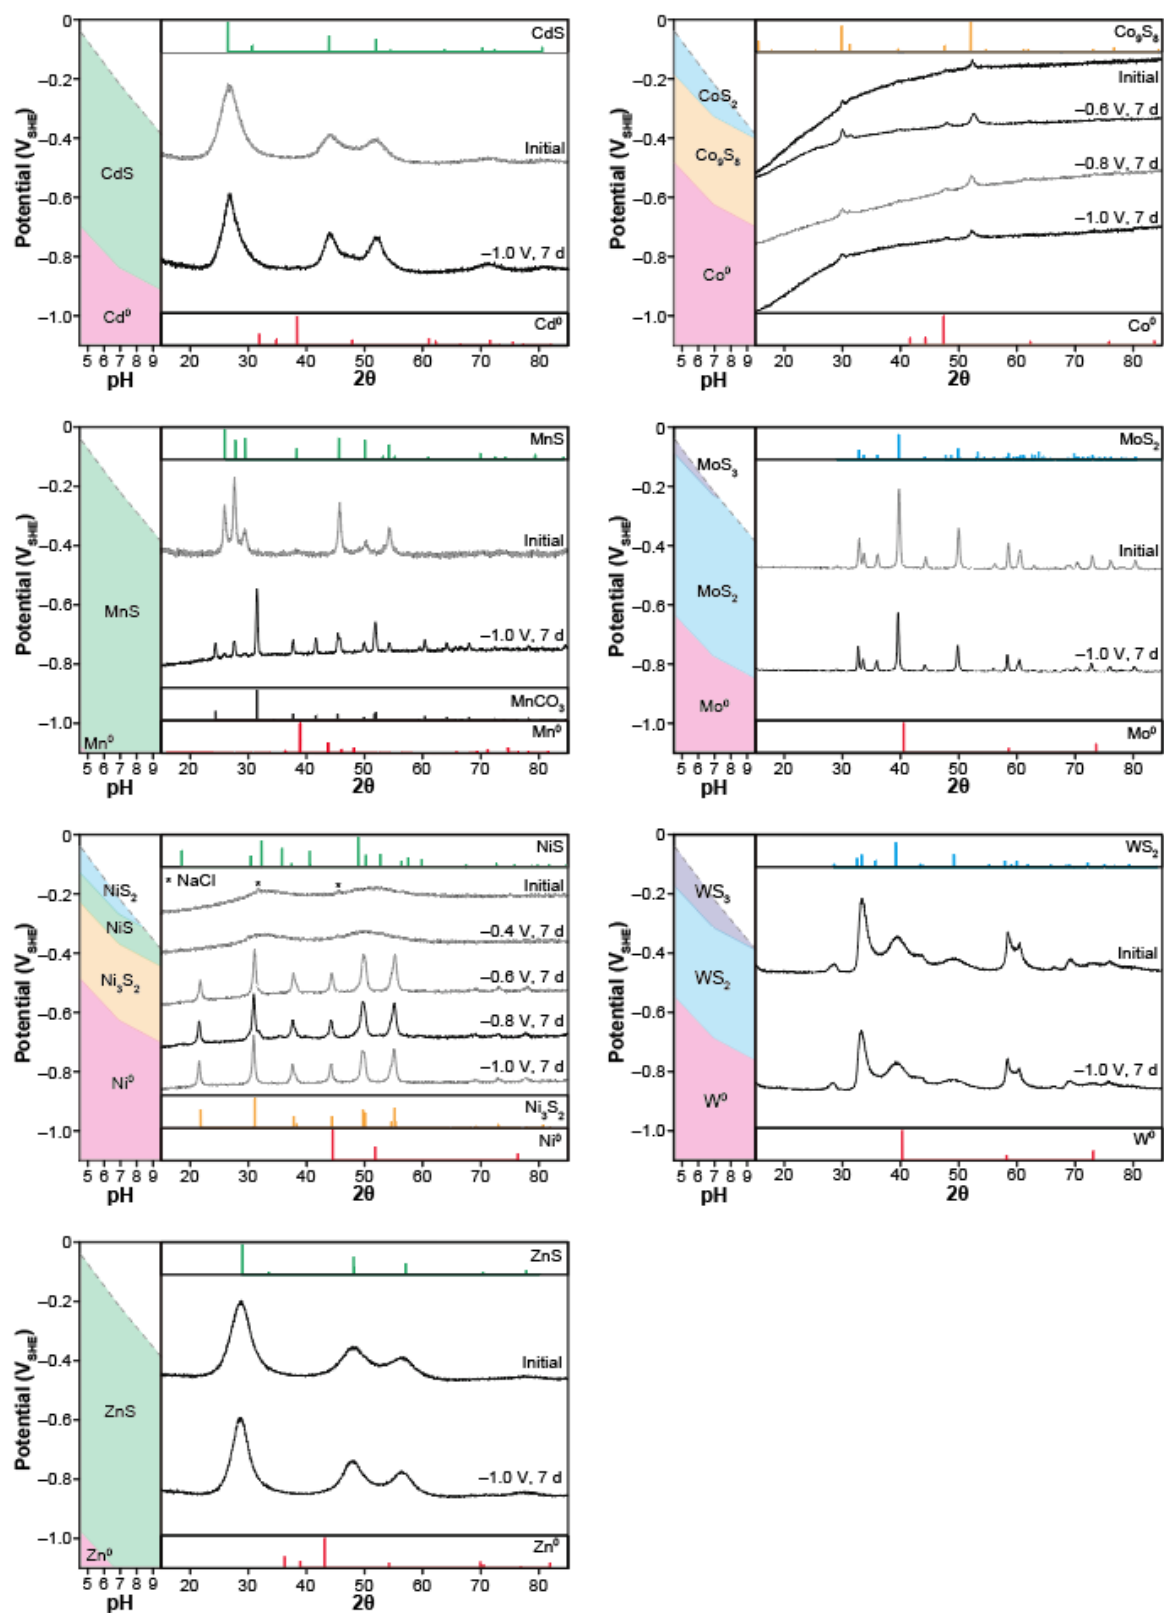

**Fig. S3.** XRD patterns of metal sulfides before and after the 7-day electrolysis. The color convention for the left columns is the same as that for the left columns in Fig 1B–E.

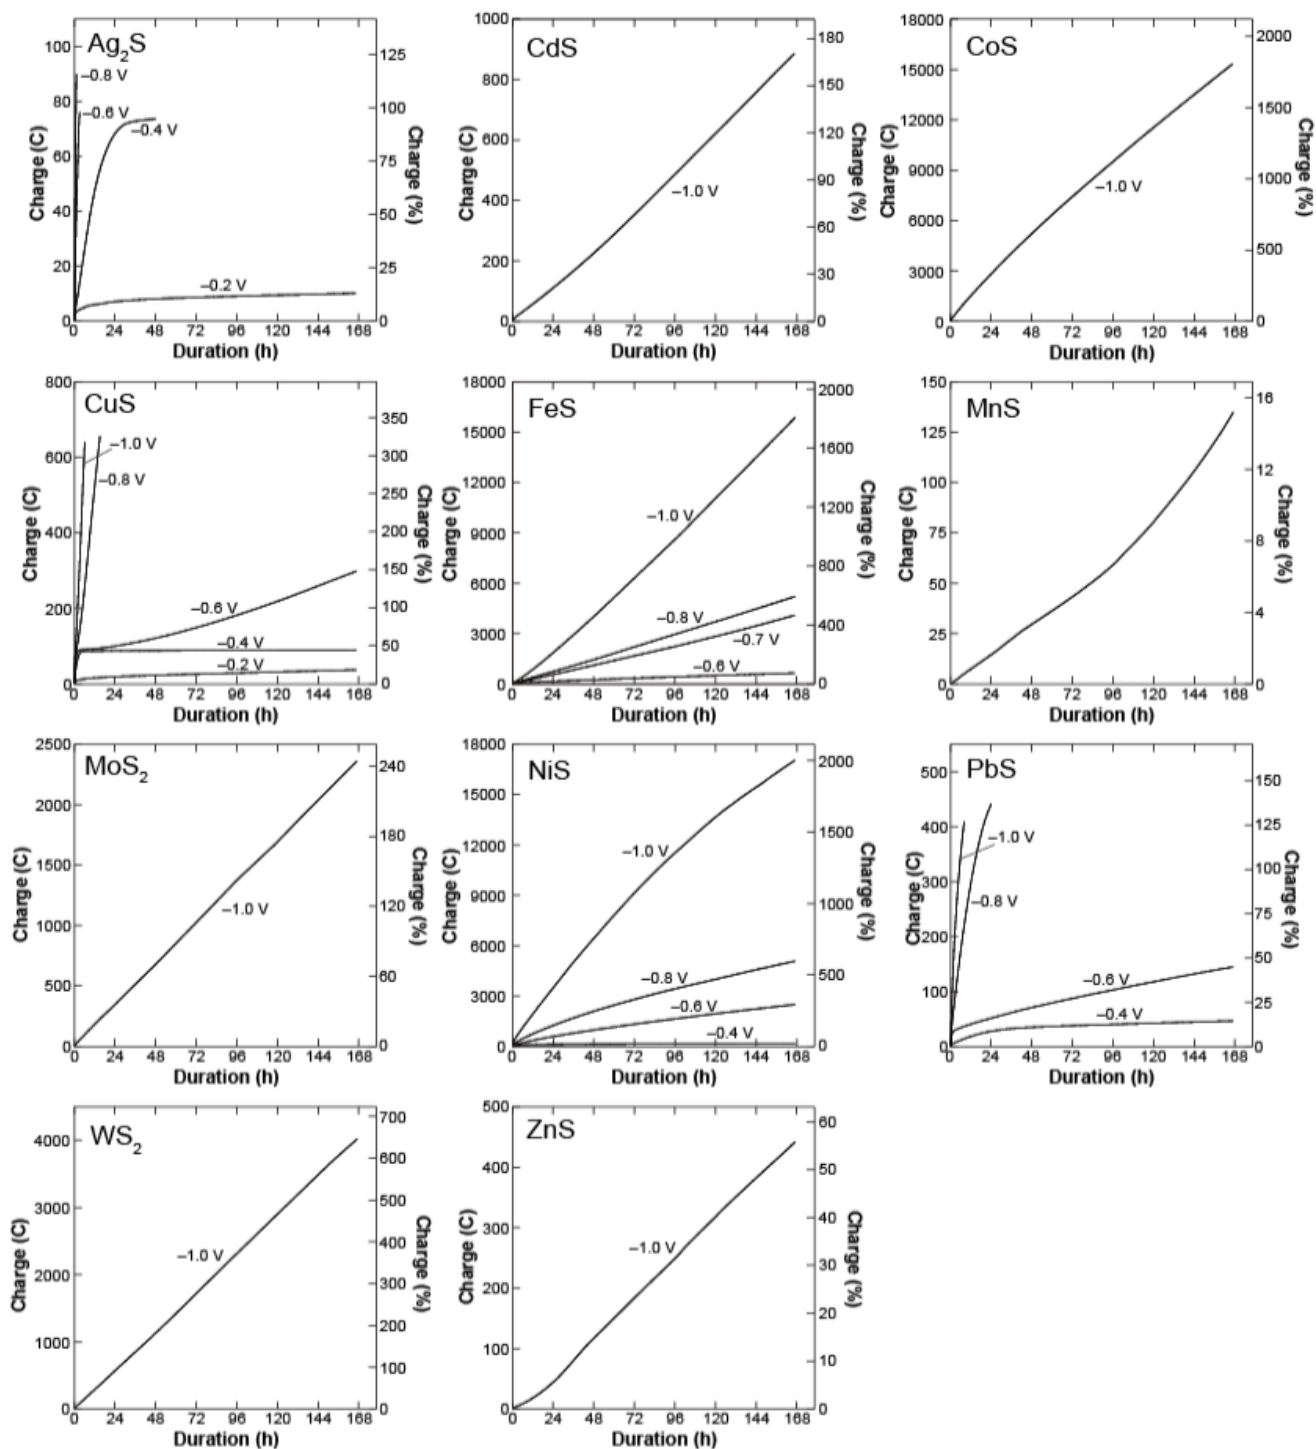

**Fig. S4. Total charges build up during the electrolysis.** The percentages shown at the right axis were calculated relative to the charge required for the complete sulfide-to-metal electroreduction for each reaction condition.

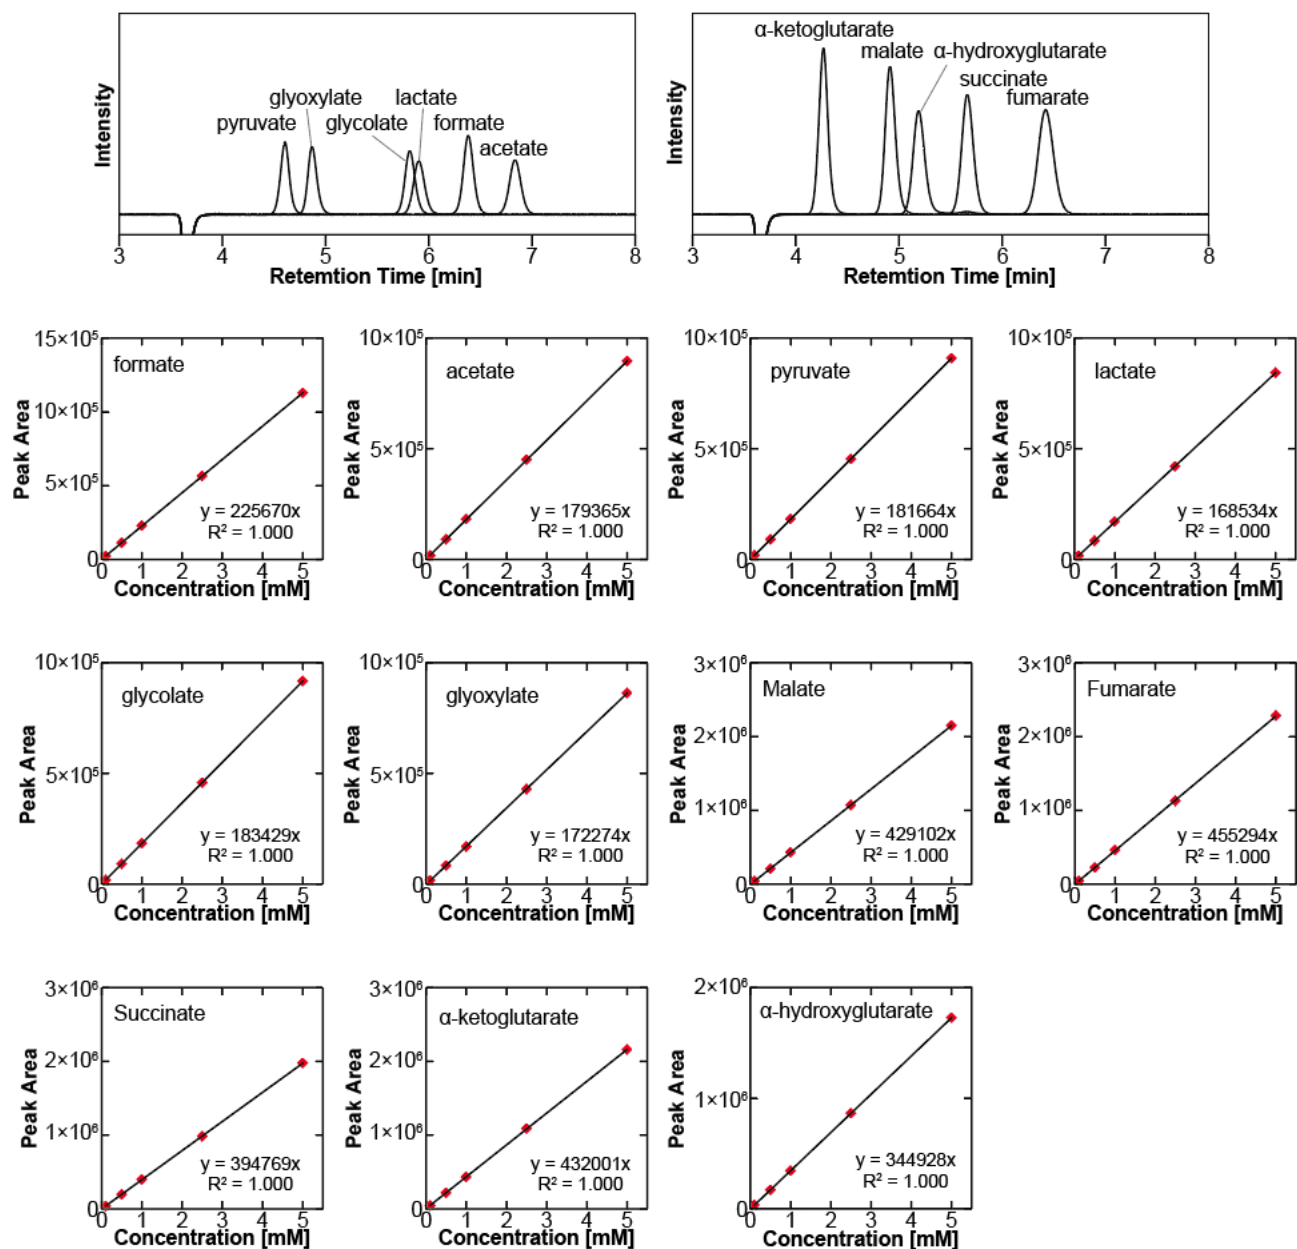

Fig. S5. Calibration curves for organic acids by the LC-electric conductivity detector system.

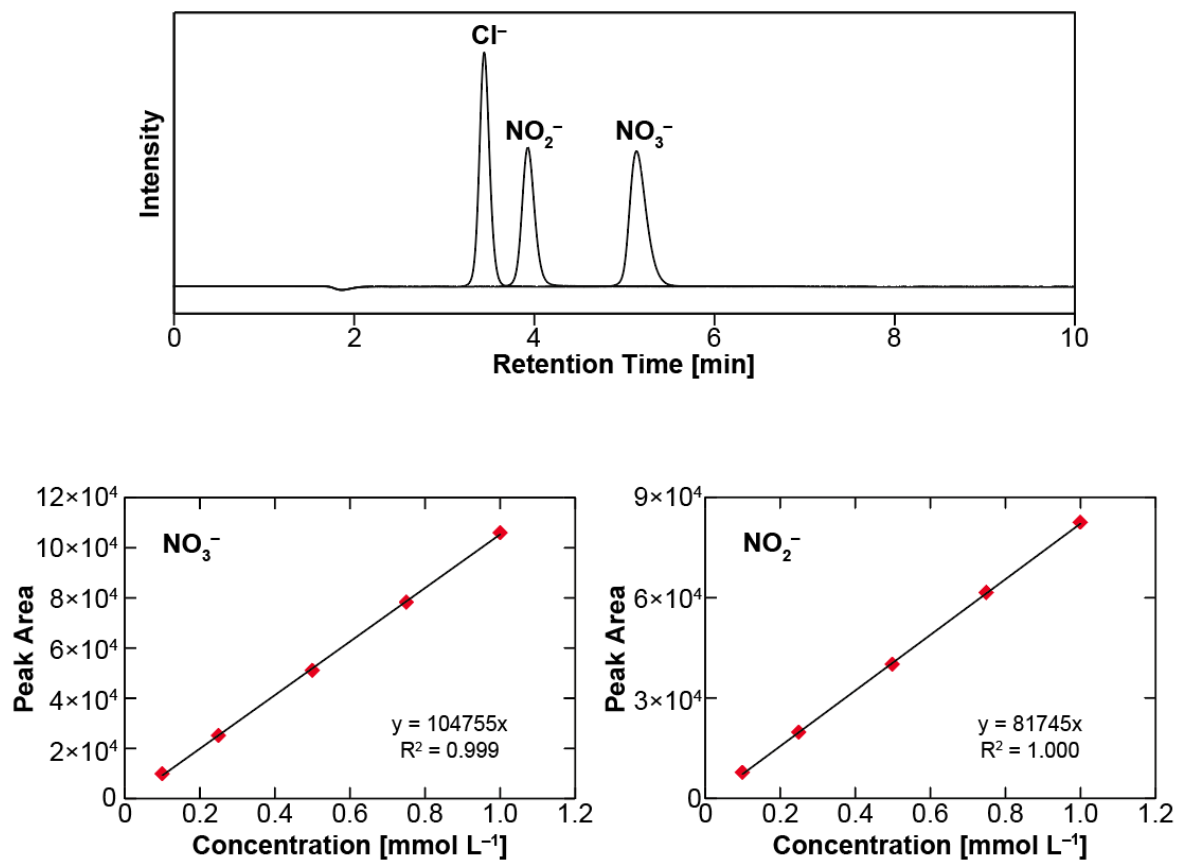

Fig. S6. Calibration curves for NO<sub>3</sub><sup>-</sup> and NO<sub>2</sub><sup>-</sup> by the LC-electric conductivity detector system.

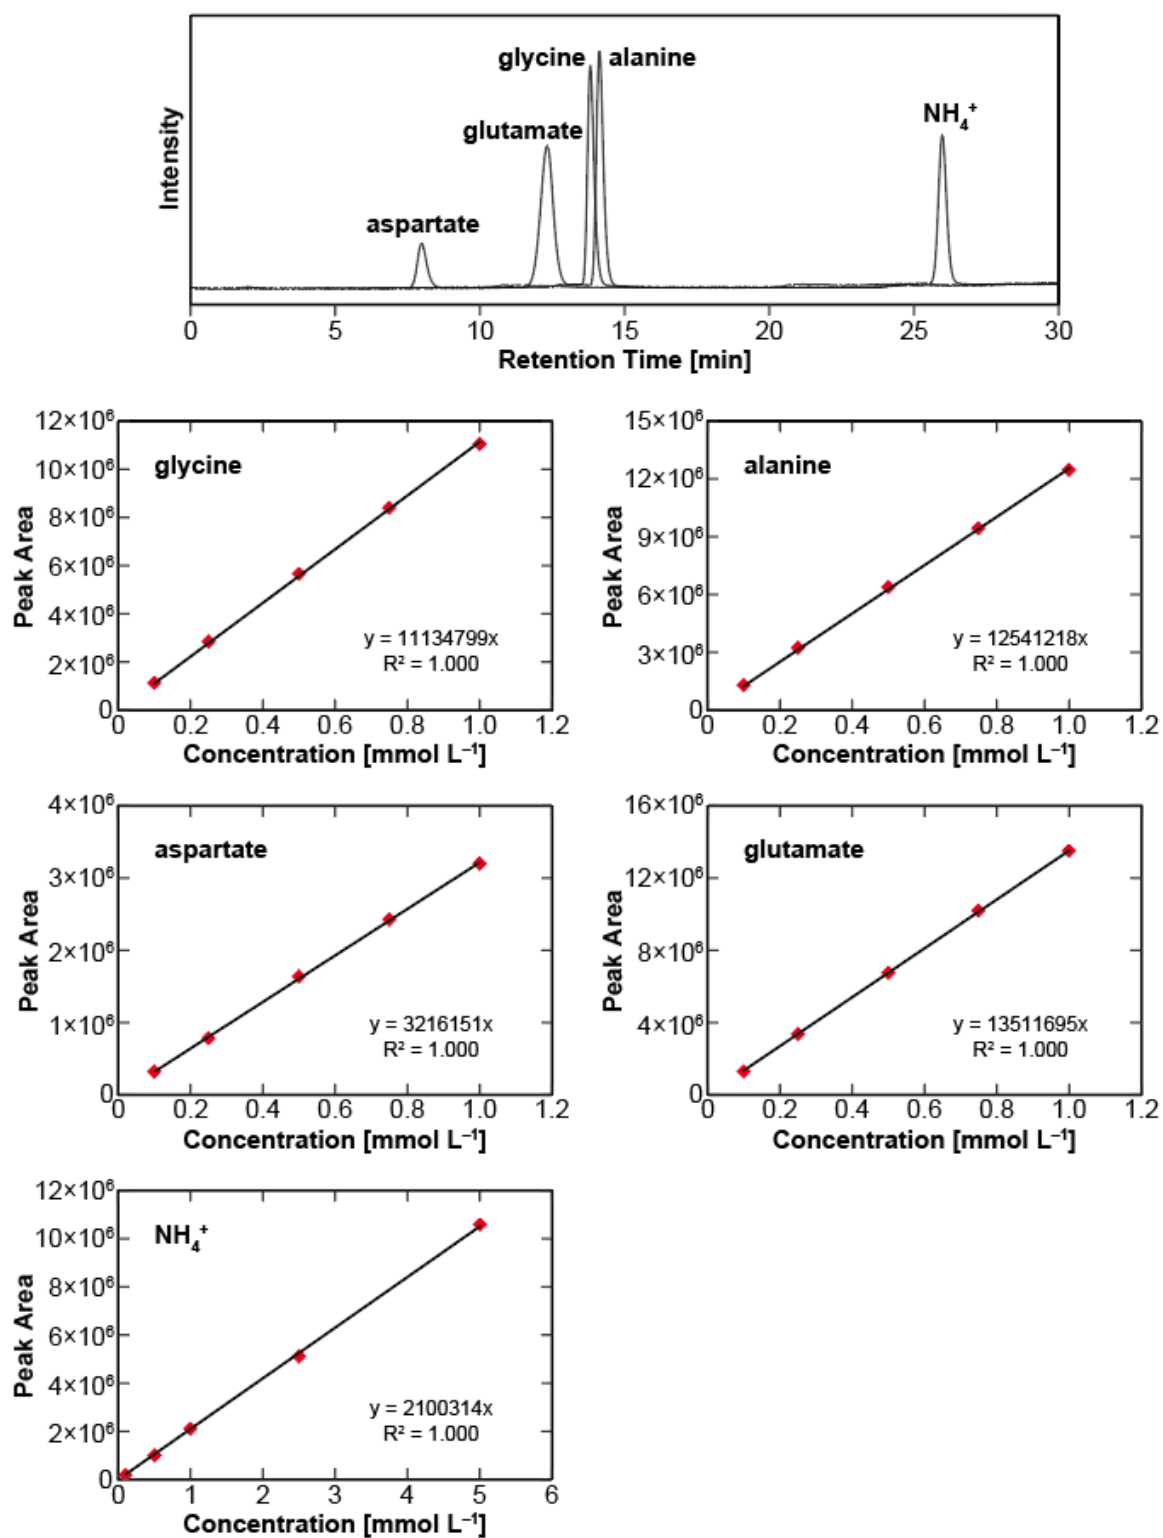

Fig. S7. Calibration curves for amino acids and ammonia by the LC-fluorescence detector system.

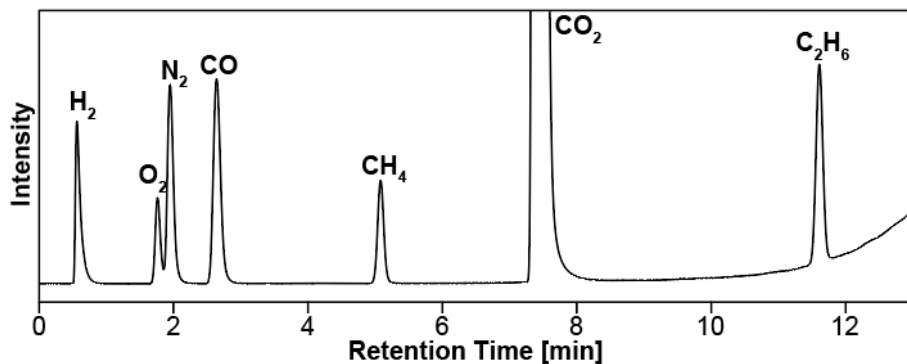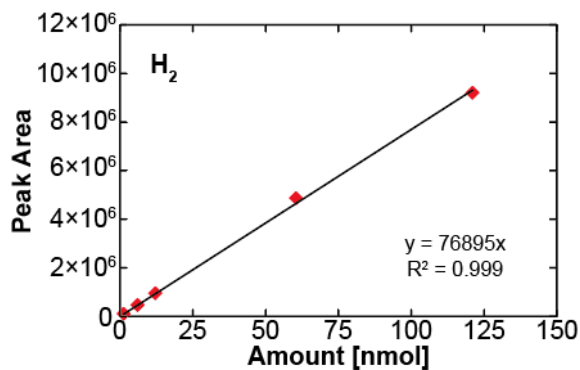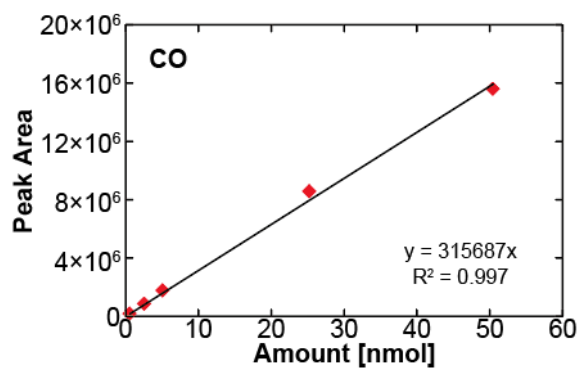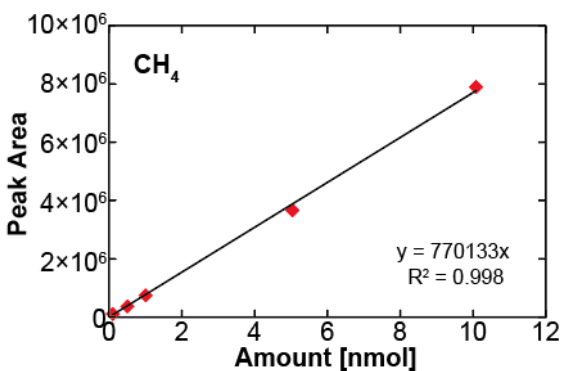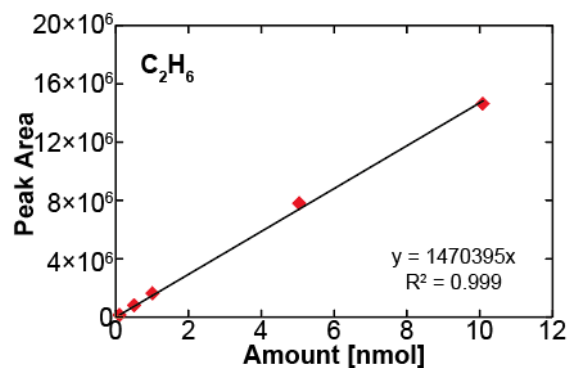

Fig. S8. Calibration curves for H<sub>2</sub>, CO, CH<sub>4</sub>, and C<sub>2</sub>H<sub>6</sub> by the GC-BID (Barrier Ionization Discharge) detector system.



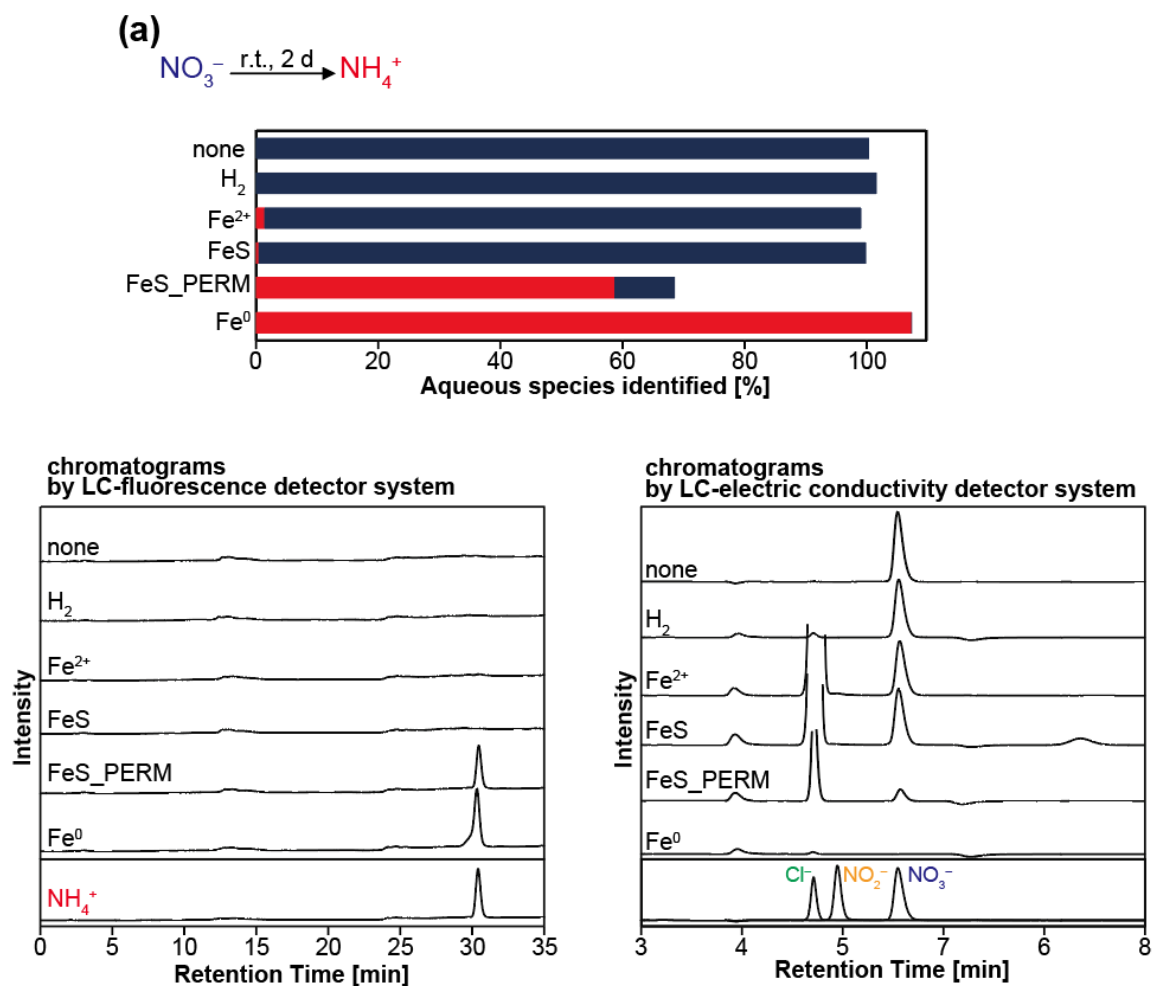

**Fig. S9. Nonenzymatic reactions in the presence of pure H<sub>2</sub> gas, FeCl<sub>2</sub>, FeS, FeS\_PERM, and Fe<sup>0</sup> and those examined in the absence of reductant.** <sup>1</sup>H NMR spectra and chromatograms of sample products are shown with those of the standards relevant to the respective reactions. For clarity, <sup>1</sup>H NMR spectra are presented after deleting residual suppressed water signal around 4.8 ppm. An intense <sup>1</sup>H NMR signal around 4.2 ppm seen in the spectra of glyoxylate samples (**d**) are due to a glyoxylate oligomer formed in the presence of ammonia catalyst at alkaline pH (A. Hoefnagel, H. van Bekkum, J. A. Peters, The reaction of glyoxylic acid with ammonia revisited. *J. Org. Chem.* **57**, 3916–3921 (1992)).

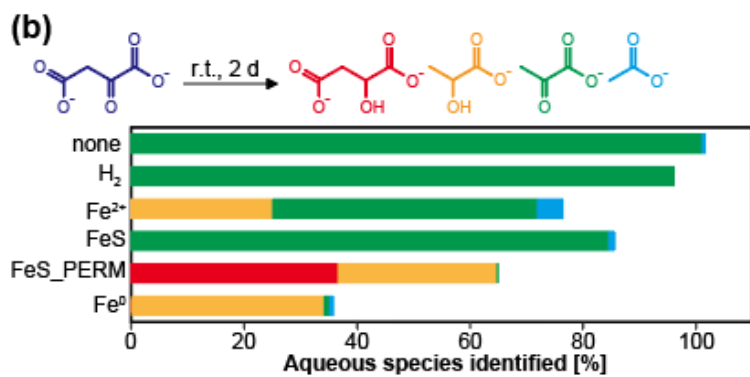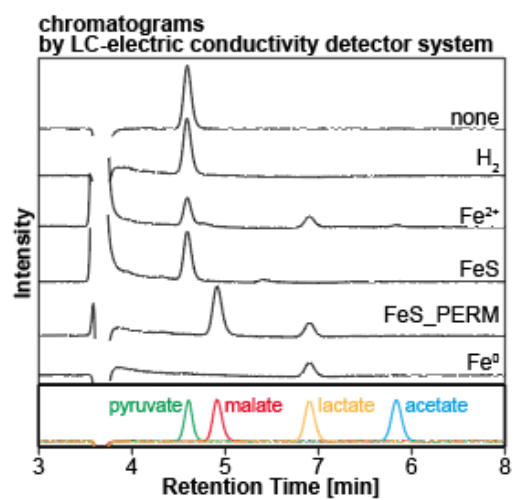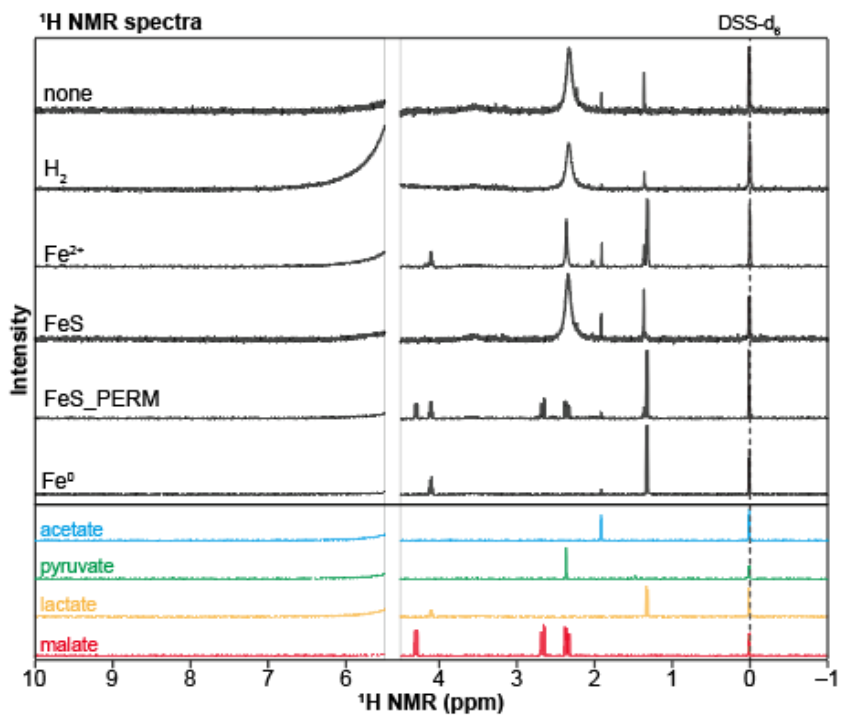

Fig. S9. (continued)

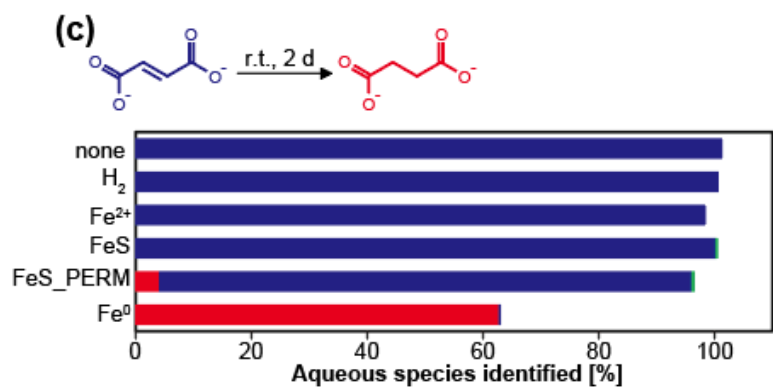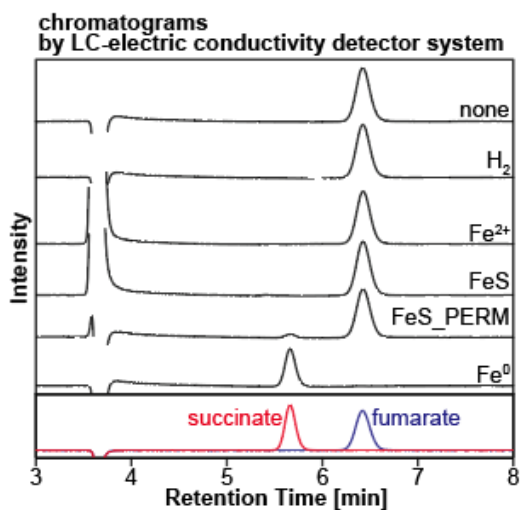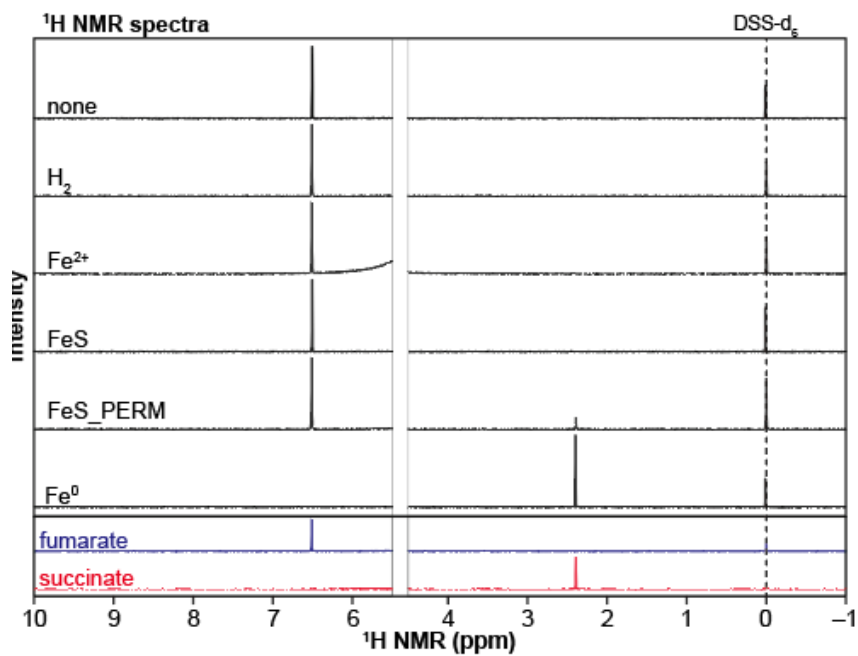

Fig. S9. (continued)

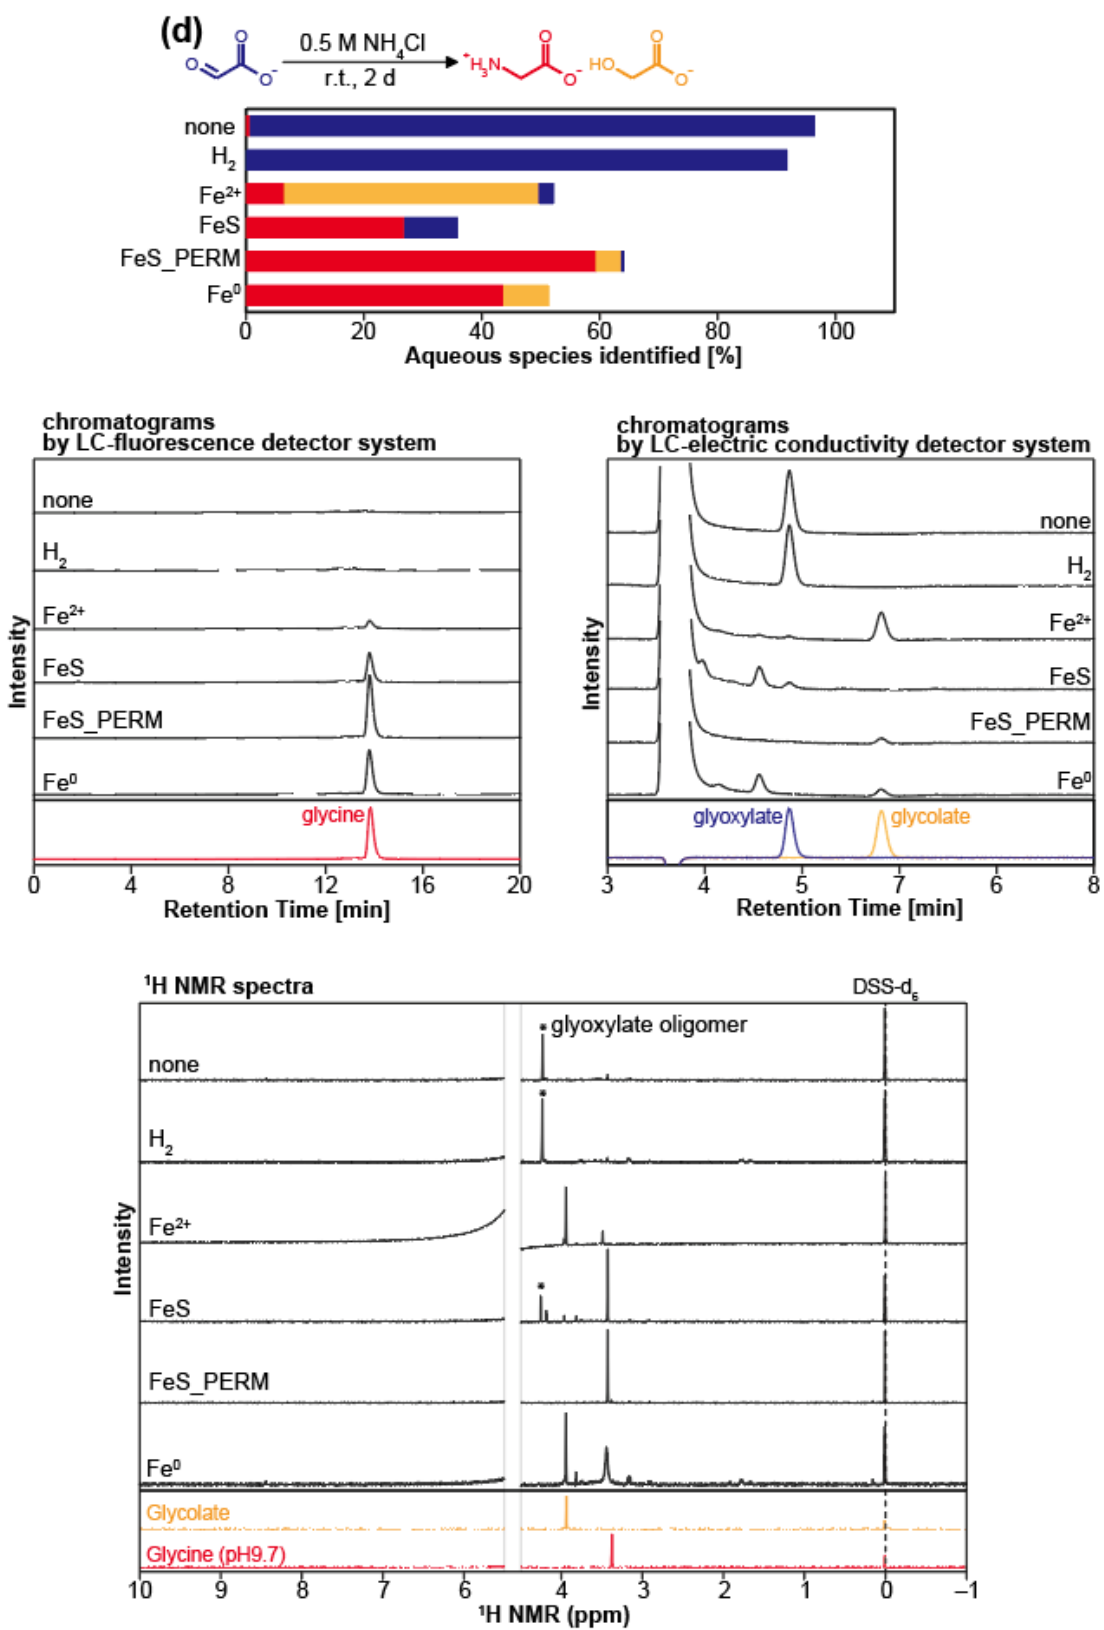

Fig. S9. (continued)

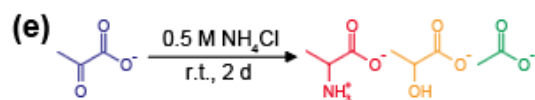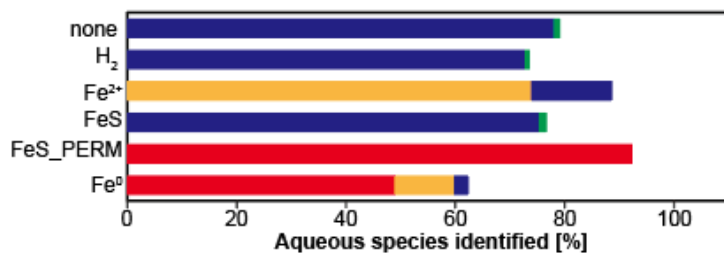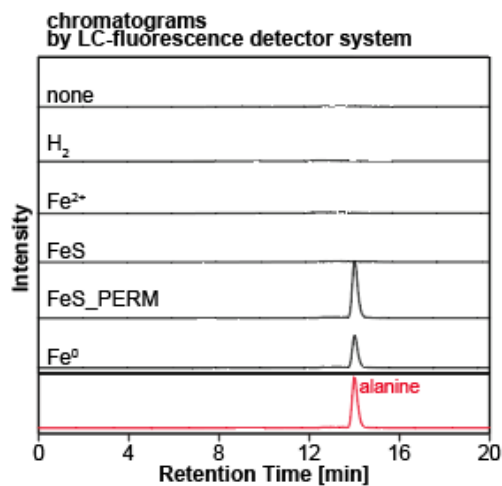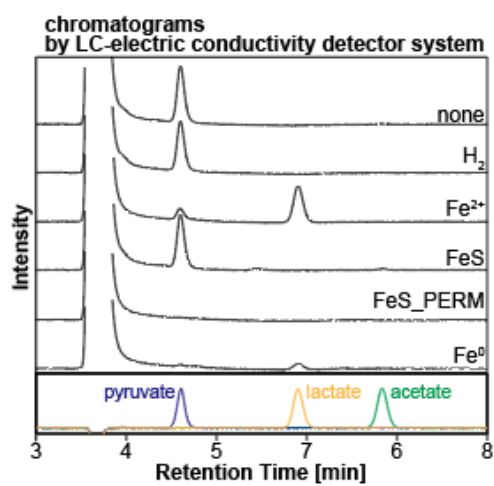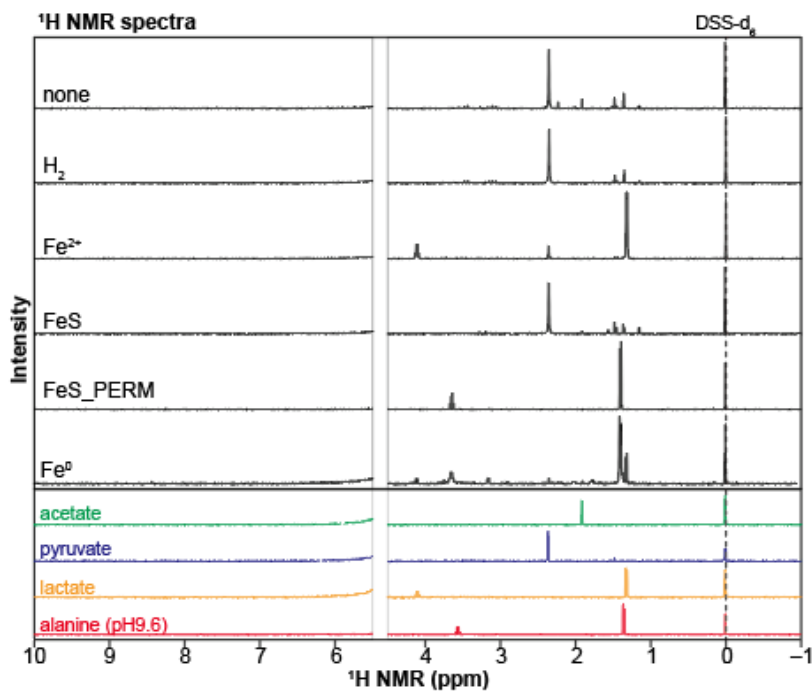

Fig. S9. (continued)

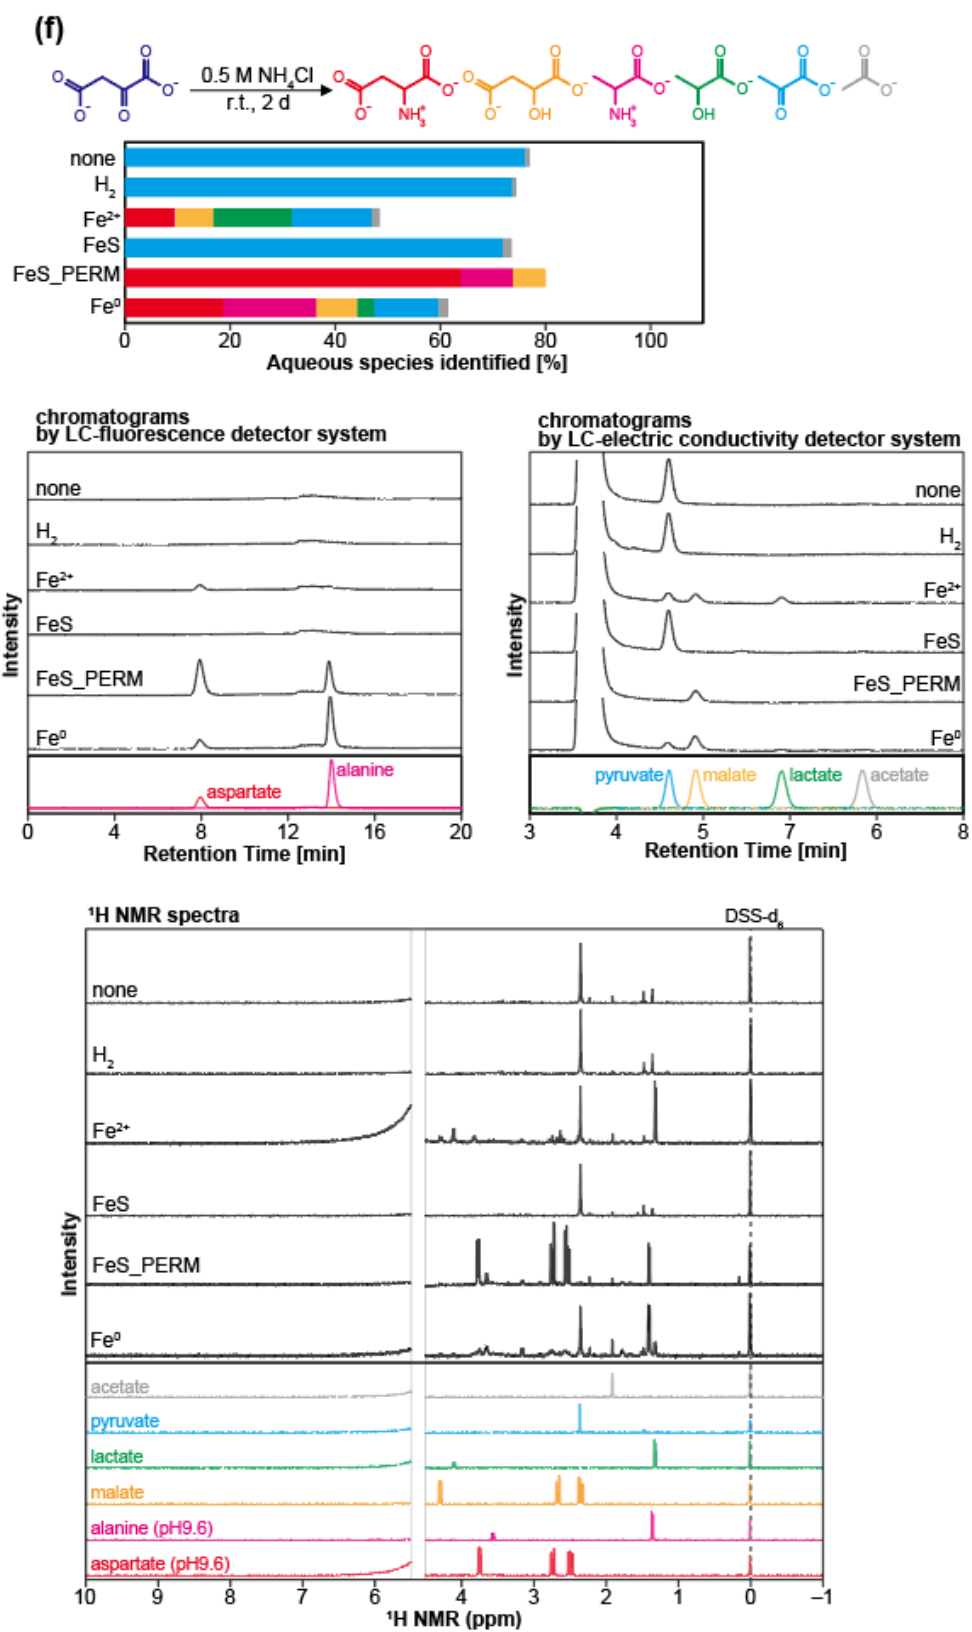

**Fig. S9.** (continued)

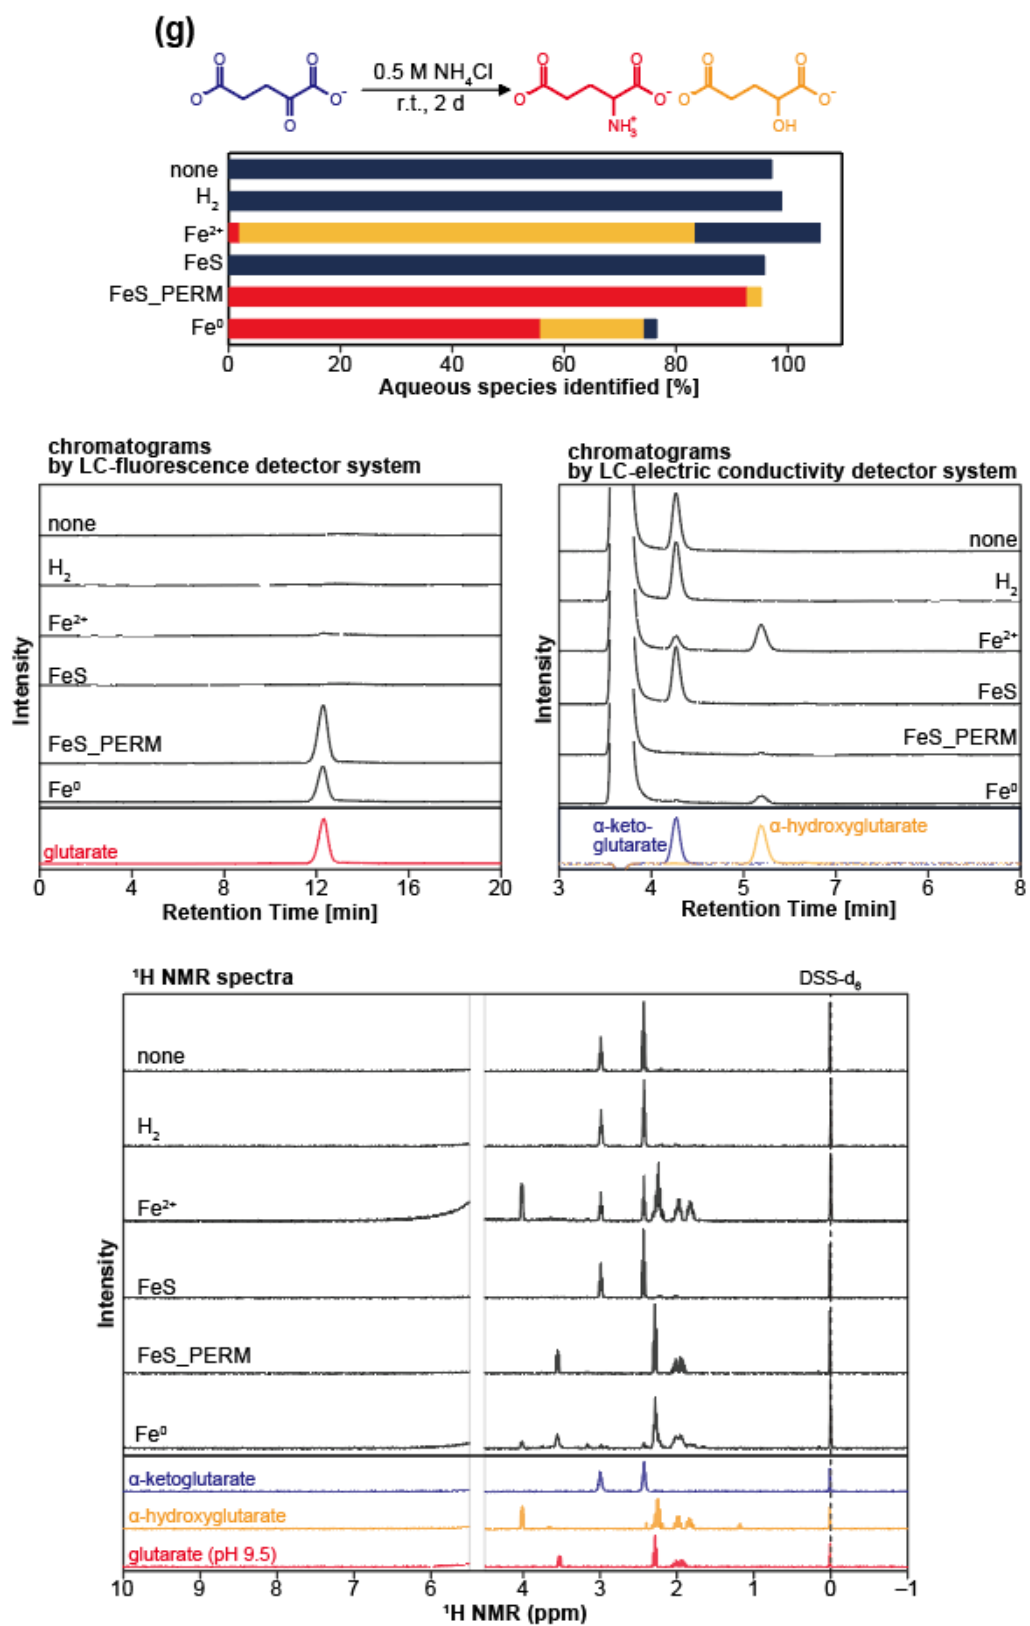

**Fig. S9.** (continued)

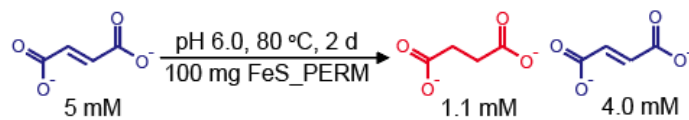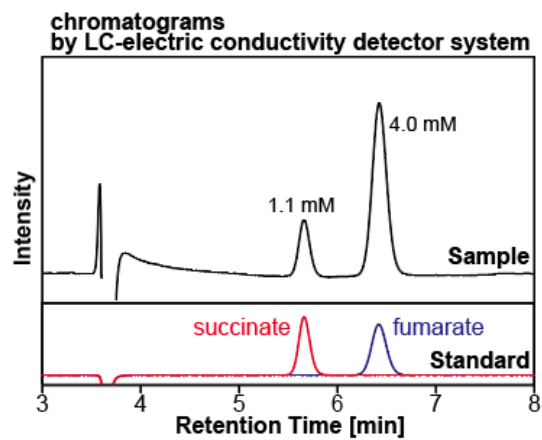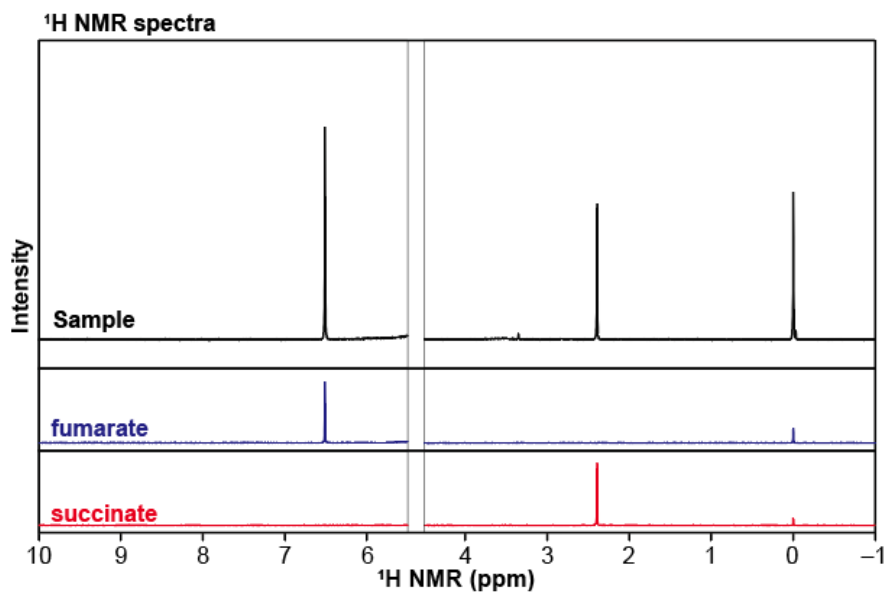

Fig. S10. Analytical results of fumarate (5 mM, 1.5 ml) incubated with the FeS\_PERM (100 mg) at 80°C for 2 days.



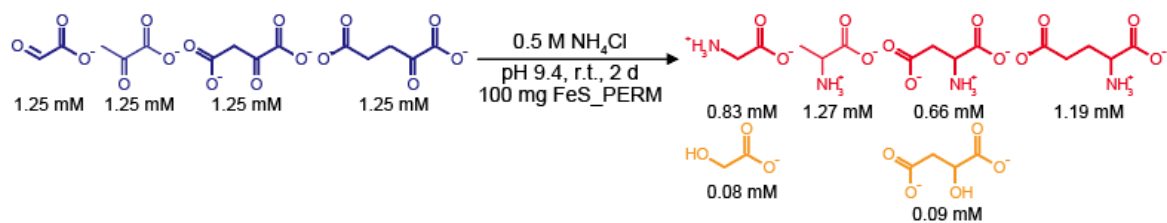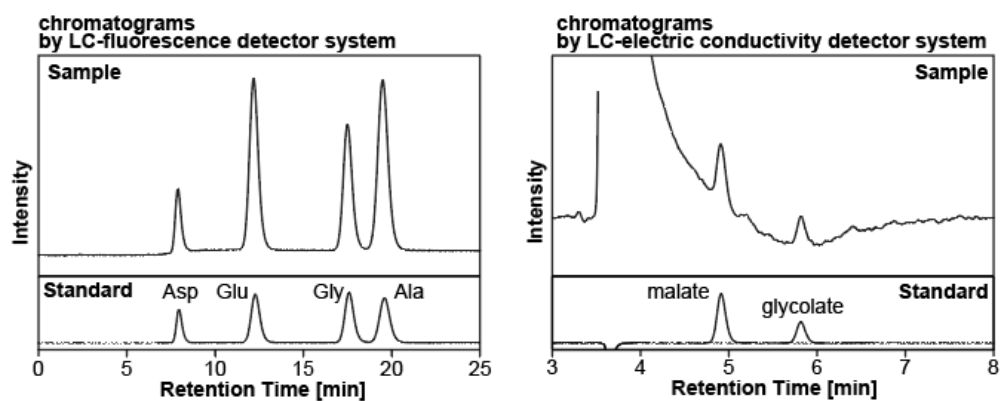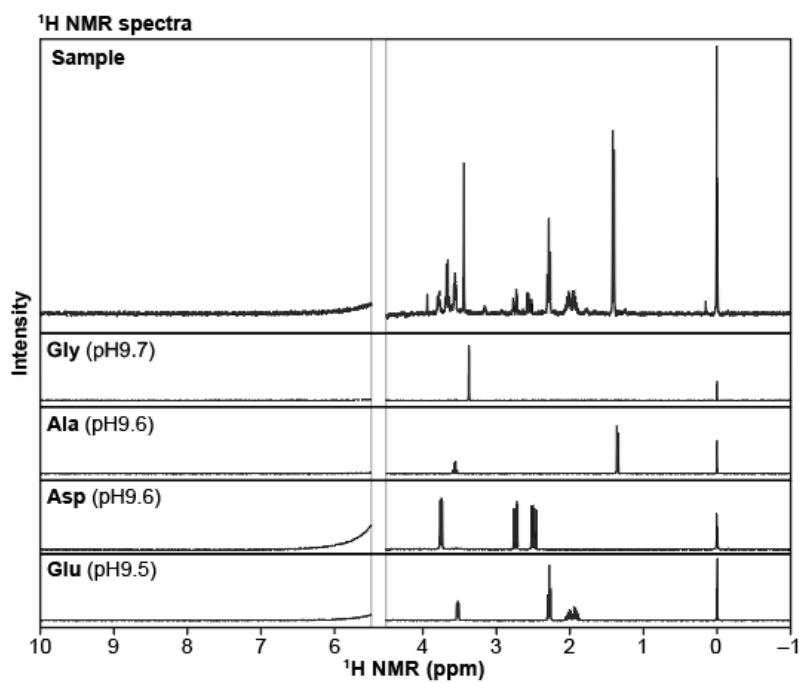

Fig. S11. Reductive amination of four keto acids promoted by the FeS\_PERM in one serum bottle.

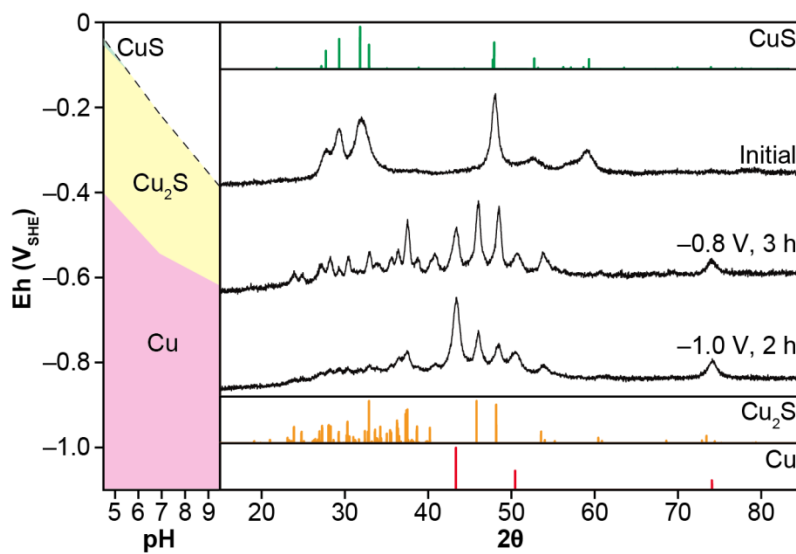

**Fig. S12. XRD patterns of CuS electrolyzed at  $-0.8$  and  $-1.0$  V (versus SHE) for short durations.**

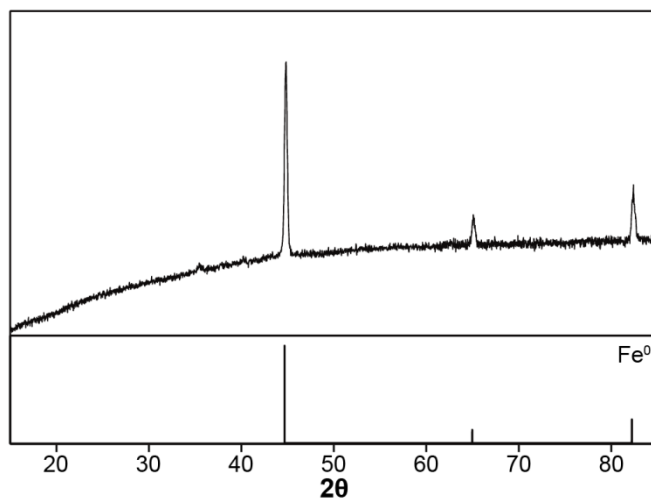

**Fig. S13. XRD patterns of pure Fe<sup>0</sup> used in the present study.**

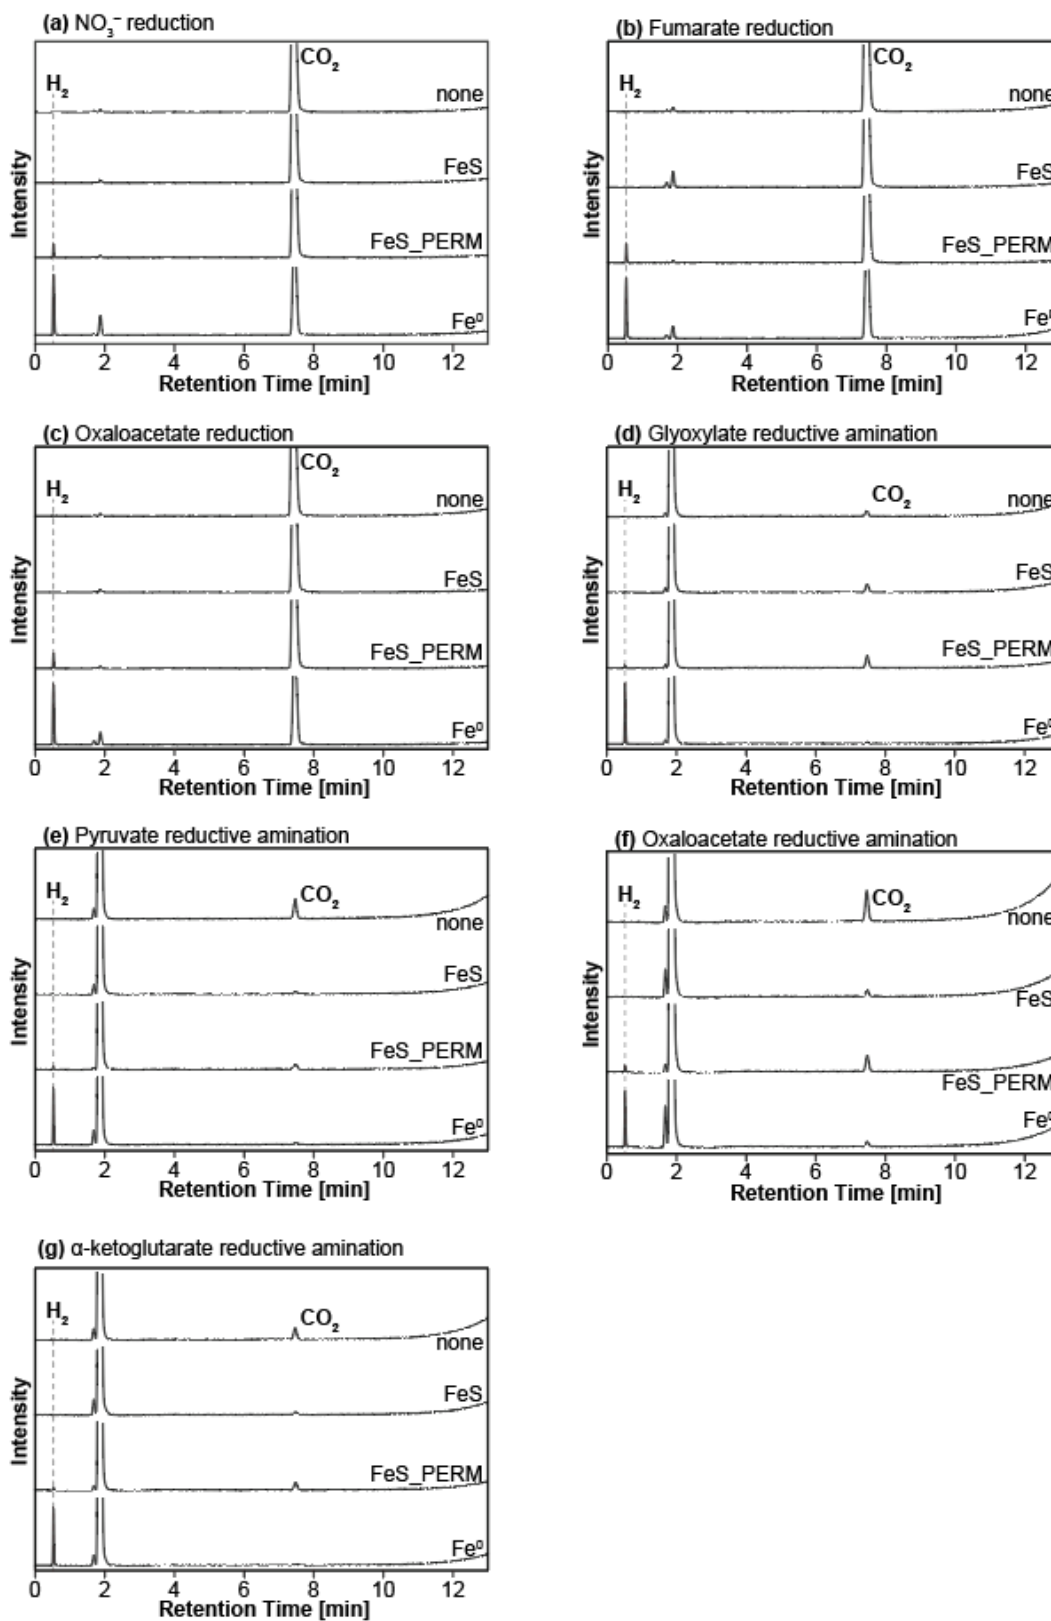

**Fig. S14. GC chromatograms of the gas headspaces of serum bottles measured after the reduction experiments of organic/inorganic compounds.** All chromatograms show the O<sub>2</sub>, N<sub>2</sub>, and CO<sub>2</sub> signals (partly) due to the intrusion of air into the GC system at the sample injections

**Table S1. Summary of the reduction experiments of organic/inorganic compounds.**(a)  $\text{NO}_3^-$  reduction ( $[\text{NO}_3^-]_i = 5 \text{ mmol L}^{-1}$ )

| reductant         | pH  | $\text{NH}_4^+$<br>[mmol L <sup>-1</sup> ] | $\text{NO}_3^-$<br>[mmol L <sup>-1</sup> ] |
|-------------------|-----|--------------------------------------------|--------------------------------------------|
| none              | 4.7 | <0.01                                      | 5.03 ± 0.11                                |
| H <sub>2</sub>    | 3.0 | <0.01                                      | 5.09 ± 0.25                                |
| FeCl <sub>2</sub> | 4.5 | <b>0.07 ± 0.00</b>                         | 4.90 ± 0.24                                |
| FeS               | 6.7 | <b>0.02 ± 0.02</b>                         | 4.98 ± 0.01                                |
| FeS_PERM          | 6.5 | <b>2.94 ± 0.06</b>                         | 0.49 ± 0.49                                |
| Fe <sup>0</sup>   | 6.5 | <b>5.38 ± 0.01</b>                         | <0.01                                      |

(b) Oxaloacetate reduction ( $[\text{Oxaloacetate}]_i = 5 \text{ mmol L}^{-1}$ )

| reductant         | pH  | Malate<br>[mmol L <sup>-1</sup> ] | Lactate<br>[mmol L <sup>-1</sup> ] | Pyruvate<br>[mmol L <sup>-1</sup> ] | Acetate<br>[mmol L <sup>-1</sup> ] |
|-------------------|-----|-----------------------------------|------------------------------------|-------------------------------------|------------------------------------|
| none              | 2.8 | <0.01                             | <0.01                              | 5.05 ± 0.41                         | 0.03 ± 0.00                        |
| H <sub>2</sub>    | 2.8 | <0.01                             | <0.01                              | 4.81 ± 0.24                         | <0.01                              |
| FeCl <sub>2</sub> | 2.8 | <0.01                             | 1.25 ± 0.06                        | 2.34 ± 0.12                         | 0.23 ± 0.01                        |
| FeS               | 6.5 | <0.01                             | <0.01                              | 4.22 ± 0.15                         | <0.01                              |
| FeS_PERM          | 6.4 | <b>1.83 ± 0.29</b>                | 1.40 ± 0.19                        | 0.01 ± 0.01                         | <0.01                              |
| Fe <sup>0</sup>   | 6.5 | <0.01                             | 1.70 ± 0.15                        | 0.05 ± 0.01                         | 0.04 ± 0.00                        |

(c) Fumarate reduction ( $[\text{Fumarate}]_i = 5 \text{ mmol L}^{-1}$ )

| reductant         | pH  | Succinate<br>[mmol L <sup>-1</sup> ] | Fumarate<br>[mmol L <sup>-1</sup> ] | Malate<br>[mmol L <sup>-1</sup> ] |
|-------------------|-----|--------------------------------------|-------------------------------------|-----------------------------------|
| none              | 3.1 | <0.01                                | 5.06 ± 0.03                         | <0.01                             |
| H <sub>2</sub>    | 3.0 | <0.01                                | 5.06 ± 0.25                         | <0.01                             |
| FeCl <sub>2</sub> | 2.9 | <0.01                                | 4.92 ± 0.25                         | <0.01                             |
| FeS               | 6.3 | <0.01                                | 5.01 ± 0.05                         | 0.02 ± 0.02                       |
| FeS_PERM          | 6.4 | <b>0.21 ± 0.07</b>                   | 4.59 ± 0.02                         | 0.02 ± 0.02                       |
| Fe <sup>0</sup>   | 6.4 | <b>3.14 ± 0.03</b>                   | 0.02 ± 0.00                         | <0.01                             |

(d) Glyoxylate reductive amination ( $[\text{Glyoxylate}]_i = 5 \text{ mmol L}^{-1}$ )

| reductant         | pH  | Glycine<br>[mmol L <sup>-1</sup> ] | Glycolate<br>[mmol L <sup>-1</sup> ] | Glyoxylate<br>[mmol L <sup>-1</sup> ] |
|-------------------|-----|------------------------------------|--------------------------------------|---------------------------------------|
| none              | 9.6 | <b>0.03 ± 0.00</b>                 | <0.01                                | 4.79 ± 0.11                           |
| H <sub>2</sub>    | 9.5 | <0.01                              | <0.01                                | 4.59 ± 0.23                           |
| FeCl <sub>2</sub> | 9.1 | <b>0.33 ± 0.02</b>                 | 2.16 ± 0.11                          | 0.13 ± 0.01                           |
| FeS               | 9.6 | <b>1.34 ± 0.06</b>                 | <0.01                                | 0.45 ± 0.07                           |
| FeS_PERM          | 9.6 | <b>2.97 ± 0.02</b>                 | 0.21 ± 0.20                          | 0.02 ± 0.00                           |
| Fe <sup>0</sup>   | 9.6 | <b>2.19 ± 0.04</b>                 | 0.38 ± 0.13                          | <0.01                                 |

(e) Pyruvate reductive amination ( $[\text{Pyruvate}]_i = 5 \text{ mmol L}^{-1}$ )

| reductant         | pH  | Alanine<br>[mmol L <sup>-1</sup> ] | Lactate<br>[mmol L <sup>-1</sup> ] | Pyruvate<br>[mmol L <sup>-1</sup> ] | Acetate<br>[mmol L <sup>-1</sup> ] |
|-------------------|-----|------------------------------------|------------------------------------|-------------------------------------|------------------------------------|
| none              | 9.6 | <0.01                              | <0.01                              | 3.90 ± 0.23                         | 0.05 ± 0.02                        |
| H <sub>2</sub>    | 9.5 | <0.01                              | <0.01                              | 3.64 ± 0.18                         | 0.03 ± 0.00                        |
| FeCl <sub>2</sub> | 9.1 | <0.01                              | 3.70 ± 0.18                        | 0.74 ± 0.04                         | <0.01                              |
| FeS               | 9.6 | <0.01                              | <0.01                              | 3.77 ± 0.11                         | 0.07 ± 0.03                        |
| FeS_PERM          | 9.6 | <b>4.61 ± 0.18</b>                 | <0.01                              | <0.01                               | <0.01                              |
| Fe <sup>0</sup>   | 9.6 | <b>2.45 ± 0.01</b>                 | 0.55 ± 0.08                        | 0.12 ± 0.00                         | <0.01                              |

(f) Oxaloacetate reductive amination ( $[\text{Oxaloacetate}]_i = 5 \text{ mmol L}^{-1}$ )

| reductant         | pH  | Aspartate<br>[mmol L <sup>-1</sup> ] | Alanine<br>[mmol L <sup>-1</sup> ] | Malate<br>[mmol L <sup>-1</sup> ] | Lactate<br>[mmol L <sup>-1</sup> ] | Pyruvate<br>[mmol L <sup>-1</sup> ] | Acetate<br>[mmol L <sup>-1</sup> ] |
|-------------------|-----|--------------------------------------|------------------------------------|-----------------------------------|------------------------------------|-------------------------------------|------------------------------------|
| none              | 9.6 | <0.01                                | <0.01                              | <0.01                             | <0.01                              | 3.81 ± 0.33                         | 0.04 ± 0.04                        |
| H <sub>2</sub>    | 9.5 | <0.01                                | <0.01                              | <0.01                             | <0.01                              | 3.69 ± 0.18                         | 0.03 ± 0.00                        |
| FeCl <sub>2</sub> | 9.0 | <b>0.46 ± 0.02</b>                   | 0.02 ± 0.00                        | 0.36 ± 0.02                       | 0.74 ± 0.04                        | 0.76 ± 0.04                         | 0.07 ± 0.00                        |
| FeS               | 9.6 | <0.01                                | <0.01                              | <0.01                             | <0.01                              | 3.60 ± 0.17                         | 0.08 ± 0.03                        |
| FeS_PERM          | 9.6 | <b>3.20 ± 0.11</b>                   | 0.50 ± 0.06                        | 0.30 ± 0.19                       | <0.01                              | <0.01                               | 0.01 ± 0.01                        |
| Fe <sup>0</sup>   | 9.6 | <b>0.94 ± 0.16</b>                   | 0.89 ± 0.02                        | 0.39 ± 0.23                       | 0.16 ± 0.01                        | 0.61 ± 0.06                         | 0.08 ± 0.00                        |

(g)  $\alpha$ -ketoglutarate reductive amination ( $[\alpha\text{-ketoglutarate}]_i = 5 \text{ mmol L}^{-1}$ )

| reductant         | pH  | Glutamate<br>[mmol L <sup>-1</sup> ] | $\alpha$ -hydroxyglutarate<br>[mmol L <sup>-1</sup> ] | $\alpha$ -ketoglutarate<br>[mmol L <sup>-1</sup> ] |
|-------------------|-----|--------------------------------------|-------------------------------------------------------|----------------------------------------------------|
| none              | 9.6 | <0.01                                | <0.01                                                 | 4.87 ± 0.00                                        |
| H <sub>2</sub>    | 9.5 | <0.01                                | <0.01                                                 | 4.96 ± 0.25                                        |
| FeCl <sub>2</sub> | 9.0 | <b>0.10 ± 0.02</b>                   | 4.09 ± 0.20                                           | 1.12 ± 0.06                                        |
| FeS               | 9.6 | <0.01                                | <0.01                                                 | 4.81 ± 0.07                                        |
| FeS_PERM          | 9.6 | <b>4.65 ± 0.06</b>                   | 0.13 ± 0.10                                           | <0.01                                              |
| Fe <sup>0</sup>   | 9.6 | <b>2.80 ± 0.09</b>                   | 0.93 ± 0.31                                           | 0.11 ± 0.01                                        |

**Table S2. Amounts of H<sub>2</sub>, CO, CH<sub>4</sub>, and C<sub>2</sub>H<sub>6</sub> in the serum bottles (30 ml) after the reduction experiments of organic/inorganic compounds.**

(a) NO<sub>3</sub><sup>-</sup> reduction

| reductant       | H <sub>2</sub> [μmol] | CO [μmol] | CH <sub>4</sub> [μmol] | C <sub>2</sub> H <sub>6</sub> [μmol] |
|-----------------|-----------------------|-----------|------------------------|--------------------------------------|
| none            | <0.1                  | <0.01     | <0.01                  | <0.01                                |
| FeS             | <0.1                  | <0.01     | <0.01                  | <0.01                                |
| FeS_PERM        | 58.8                  | <0.01     | <0.01                  | <0.01                                |
| Fe <sup>0</sup> | 350.6                 | <0.01     | 0.02                   | <0.01                                |

(b) Fumarate reduction

| reductant       | H <sub>2</sub> [μmol] | CO [μmol] | CH <sub>4</sub> [μmol] | C <sub>2</sub> H <sub>6</sub> [μmol] |
|-----------------|-----------------------|-----------|------------------------|--------------------------------------|
| none            | 0.2                   | <0.01     | <0.01                  | <0.01                                |
| FeS             | <0.1                  | <0.01     | <0.01                  | <0.01                                |
| FeS_PERM        | 82.8                  | <0.01     | <0.01                  | <0.01                                |
| Fe <sup>0</sup> | 348.1                 | <0.01     | 0.02                   | <0.01                                |

(c) Oxaloacetate reduction

| reductant       | H <sub>2</sub> [μmol] | CO [μmol] | CH <sub>4</sub> [μmol] | C <sub>2</sub> H <sub>6</sub> [μmol] |
|-----------------|-----------------------|-----------|------------------------|--------------------------------------|
| none            | 0.1                   | <0.01     | <0.01                  | <0.01                                |
| FeS             | <0.1                  | <0.01     | <0.01                  | <0.01                                |
| FeS_PERM        | 65.4                  | <0.01     | <0.01                  | <0.01                                |
| Fe <sup>0</sup> | 356.2                 | <0.01     | 0.02                   | <0.01                                |

(d) Glyoxylate reductive amination

| reductant          | H <sub>2</sub> [μmol] | CO [μmol] | CH <sub>4</sub> [μmol] | C <sub>2</sub> H <sub>6</sub> [μmol] |
|--------------------|-----------------------|-----------|------------------------|--------------------------------------|
| none               | 0.2                   | <0.01     | <0.01                  | <0.01                                |
| FeS                | <0.1                  | <0.01     | <0.01                  | <0.01                                |
| FeS <sub>PEM</sub> | 4.7                   | <0.01     | <0.01                  | <0.01                                |
| Fe <sup>0</sup>    | 77.9                  | <0.01     | <0.01                  | <0.01                                |

(e) Pyruvate reductive amination

| reductant       | H <sub>2</sub> [μmol] | CO [μmol] | CH <sub>4</sub> [μmol] | C <sub>2</sub> H <sub>6</sub> [μmol] |
|-----------------|-----------------------|-----------|------------------------|--------------------------------------|
| none            | <0.1                  | <0.01     | <0.01                  | <0.01                                |
| FeS             | <0.1                  | <0.01     | <0.01                  | <0.01                                |
| FeS_PERM        | 3.3                   | <0.01     | <0.01                  | <0.01                                |
| Fe <sup>0</sup> | 63.7                  | <0.01     | <0.01                  | <0.01                                |

(f) Oxaloacetate reductive amination

| reductant       | H <sub>2</sub> [μmol] | CO [μmol] | CH <sub>4</sub> [μmol] | C <sub>2</sub> H <sub>6</sub> [μmol] |
|-----------------|-----------------------|-----------|------------------------|--------------------------------------|
| none            | <0.1                  | <0.01     | <0.01                  | <0.01                                |
| FeS             | <0.1                  | <0.01     | <0.01                  | <0.01                                |
| FeS_PERM        | 3.3                   | <0.01     | <0.01                  | <0.01                                |
| Fe <sup>0</sup> | 27.4                  | <0.01     | <0.01                  | <0.01                                |

(g) α-ketoglutarate reductive amination

| reductant       | H <sub>2</sub> [μmol] | CO [μmol] | CH <sub>4</sub> [μmol] | C <sub>2</sub> H <sub>6</sub> [μmol] |
|-----------------|-----------------------|-----------|------------------------|--------------------------------------|
| none            | <0.1                  | <0.01     | <0.01                  | <0.01                                |
| FeS             | <0.1                  | <0.01     | <0.01                  | <0.01                                |
| FeS_PERM        | 2.6                   | <0.01     | <0.01                  | <0.01                                |
| Fe <sup>0</sup> | 55.5                  | <0.01     | <0.01                  | <0.01                                |

**Table S3. Thermodynamic data for sulfide minerals.**

| Sulfide                                               | $\Delta_f G_{P_r, T_r}^0$<br>[kJ/mol] | $\Delta_f H_{P_r, T_r}^0$<br>[kJ/mol] | $S_{P_r, T_r}^0$<br>[J/mol·K] | $V_T^0$<br>[cm <sup>3</sup> /mol] | $C_{P_r}^0$ [J/mol·K] <sup>a</sup>                                                                  | refs. |
|-------------------------------------------------------|---------------------------------------|---------------------------------------|-------------------------------|-----------------------------------|-----------------------------------------------------------------------------------------------------|-------|
| Ag <sub>2</sub> S, acanthite                          | -39.70                                | -32.00                                | 142.89                        | 34.19                             | 75.31 (at 298.15 K)                                                                                 | 68    |
| CdS, greenockite                                      | -146.10                               | -149.60                               | 72.18                         | 29.93                             | $35.38 + 0.01503 \times T - 533300 \times T^{-2} + 235.7 \times T^{-0.5} - 0.0000024 \times T^2$    | 68    |
| CoS, jaipurite                                        | -96.20                                | -95.16                                | 58.60                         | 16.70 <sup>b</sup>                | $42.47 + 16.95 \times 10^{-3} T$                                                                    | 70    |
| CoS <sub>2</sub> , cattierite                         | -145.10                               | -150.90                               | 74.80                         | 25.52                             | $65.82 + 0.03032 \times T - 587000 \times T^{-2}$                                                   | 68    |
| Co <sub>3</sub> S <sub>4</sub> , linnaeite            | -334.90                               | -347.50                               | 176.00                        | 62.55                             | –                                                                                                   | 68    |
| Co <sub>9</sub> S <sub>8</sub> ,<br>cobaltpentlandite | -834.69 <sup>c</sup>                  | -851.40                               | 470.70                        | 147.10 <sup>d</sup>               | $362 + 0.14 \times T$                                                                               | 70    |
| CuS, covellite                                        | -55.30                                | -54.60                                | 67.40                         | 20.42                             | $43.049 + 0.02023 \times T - 139938 \times T^{-2} + 0.435838 \times T^{-0.5}$                       | 68    |
| Cu <sub>1.75</sub> S, anilite                         | -78.50                                | -73.30                                | 107.50                        | 25.79                             | –                                                                                                   | 68    |
| Cu <sub>1.80</sub> S, digenite                        | -78.30                                | -73.00                                | 109.60                        | 25.63                             | –                                                                                                   | 68    |
| Cu <sub>1.95</sub> S, djurleite                       | -84.20                                | -78.80                                | 114.80                        | 26.89                             | –                                                                                                   | 68    |
| Cu <sub>2</sub> S, chalcocite                         | -89.20                                | -83.90                                | 116.20                        | 27.48                             | 76.84 (at 298.15 K)                                                                                 | 68    |
| FeS, mackinawite                                      | -100.07                               | -100.85 <sup>c</sup>                  | 56.52                         | 18.20 <sup>f</sup>                | $44.685 + 0.019037 \times T - 289000 \times T^{-2}$                                                 | 71    |
| FeS, troilite                                         | -102.90                               | -102.60                               | 60.30                         | 18.20                             | 50.49 (at 298.15 K)                                                                                 | 68    |
| Fe <sub>0.875</sub> S, pyrrhotite                     | -98.90                                | -97.50                                | 60.70                         | 17.49                             | 49.88 (at 298.15 K)                                                                                 | 68    |
| Fe <sub>3</sub> S <sub>4</sub> , greigite             | -311.88                               | -320.03                               | 182.13                        | 72.499 <sup>g</sup>               | $143.344 + 0.076567 \times T$                                                                       | 71    |
| FeS <sub>2</sub> , pyrite                             | -160.10                               | -171.50                               | 52.90                         | 23.94                             | $-20.32 + 0.0503 \times T - 320000 \times T^{-2} + 1787 \times T^{-0.5}$                            | 68    |
| FeS <sub>2</sub> , marcasite                          | -158.40                               | -169.50                               | 53.90                         | 24.58                             | $383.2 - 0.3173 \times T + 1676000 \times T^{-2} - 4488 \times T^{-0.5} + 0.0001676 \times T^2$     | 68    |
| MnS, alabandite                                       | -218.70                               | -213.90                               | 80.30                         | 21.46                             | $135.3 - 0.05775 \times T + 1169000 \times T^{-2} - 1435 \times T^{-0.5} + 0.00002087 \times T^2$   | 68    |
| MnS <sub>2</sub> , hauerite                           | -224.60                               | -223.80                               | 99.90                         | 34.20                             | –                                                                                                   | 68    |
| MoS <sub>2</sub>                                      | -267.14 <sup>h</sup>                  | -276.14                               | 62.57                         | 31.63 <sup>b</sup>                | $71.67318 + 7.515343 \times t - 0.044947 \times t^2 + 0.008866 \times t^3 - 0.921212 \times t^{-2}$ | 69    |
| MoS <sub>3</sub>                                      | -295.24 <sup>h</sup>                  | -310.00                               | 75.30                         | 37.97 <sup>i</sup>                | –                                                                                                   | 70    |
| Mo <sub>2</sub> S <sub>3</sub>                        | -395.62 <sup>h</sup>                  | -407.10                               | 114.98                        | 49.50 <sup>j</sup>                | $110.2911 + 32.96866 \times t + 0.000664 \times t^2 - 0.000106 \times t^3 - 0.962354 \times t^{-2}$ | 69    |
| NiS, millerite                                        | -88.30                                | -91.00                                | 52.97                         | 16.89                             | 47.11 (at 298.15 K)                                                                                 | 68    |
| Ni <sub>3</sub> S <sub>2</sub> ,<br>heazlewoodite     | -210.20                               | -216.30                               | 133.20                        | 40.95                             | $1057 - 0.8988 \times T + 8139000 \times T^{-2} - 13880 \times T^{-0.5} + 0.000466 \times T^2$      | 68    |
| NiS <sub>2</sub> , vaesite                            | -124.82 <sup>k</sup>                  | -131.38                               | 71.96                         | 27.688 <sup>g</sup>               | $64.4336 + 20.76331 \times t - 0.009134 \times t^2 + 0.002569 \times t^3 + 0.000227 \times t^{-2}$  | 69    |
| Ni <sub>3</sub> S <sub>4</sub> , polydemite           | -291.78 <sup>k</sup>                  | -301.12                               | 186.48                        | 64.326 <sup>g</sup>               | $121.9707 + 143.6585 \times t + 0.025374 \times t^2 - 0.01786 \times t^3 + 0.000434 \times t^{-2}$  | 69    |
| PbS, galena                                           | -96.80                                | -98.30                                | 91.70                         | 31.49                             | $44.6 + 0.0164 \times T$                                                                            | 68    |
| WS <sub>2</sub> , tungstenite                         | -233.00                               | -241.60                               | 67.80                         | 32.07                             | $76.33 + 0.0005561 \times T - 1137000 \times T^{-2} + 0.000001408 \times T^2$                       | 68    |
| WS <sub>3</sub>                                       | -277.68                               | -293.00                               | 77.40                         | 36.85 <sup>l</sup>                | –                                                                                                   | 70    |
| ZnS, sphalerite                                       | -199.60                               | -204.10                               | 58.70                         | 23.83                             | $61.51 + 0.0007631 \times T - 79630 \times T^{-2} - 260.4 \times T^{-0.5}$                          | 68    |
| ZnS, wurtzite                                         | -199.40                               | -203.80                               | 58.80                         | 23.85                             | $41.91 + 0.0007619 \times T - 660300 \times T^{-2} + 157.7 \times T^{-0.5}$                         | 68    |

<sup>a</sup> T = temperature [K], t = T × 10<sup>-3</sup>.<sup>b</sup> ref. (73).<sup>c</sup> calculated using the values of  $\Delta_f H^0$  and  $S^0$  listed in the table together with the standard molar entropies of Co and S reported by ref. (68).

<sup>d</sup> ref. (72).

<sup>e</sup> calculated using the values of  $\Delta_f G^\circ$  and  $S^\circ$  listed in the table together with the standard molar entropies of Fe and S reported by ref. (68).

<sup>f</sup> assumed to be the same as that of troilite.

<sup>g</sup> ref. (75).

<sup>h</sup> calculated using the values of  $\Delta_f H^\circ$  and  $S^\circ$  listed in the table together with the standard molar entropies of Mo and S reported by ref. (68).

<sup>i</sup> calculated using the density value for  $\text{MoS}_2$  reported by ref. (73).

<sup>j</sup> ref. (74).

<sup>k</sup> calculated using the values of  $\Delta_f H^\circ$  and  $S^\circ$  listed in the table together with the standard molar entropies of Ni and S reported by ref. (68).

<sup>l</sup> calculated using the density value for  $\text{WS}_2$  reported by ref. (73).
